# Supplementary material for: Protein sequences bound to mineral surfaces persist into deep time
Source: eLife journal article supplement (doi:10.7554/elife.17092), 2016-09-26
Supplement: supp2 [file elife-17092-supp2-v1.pdf]

1

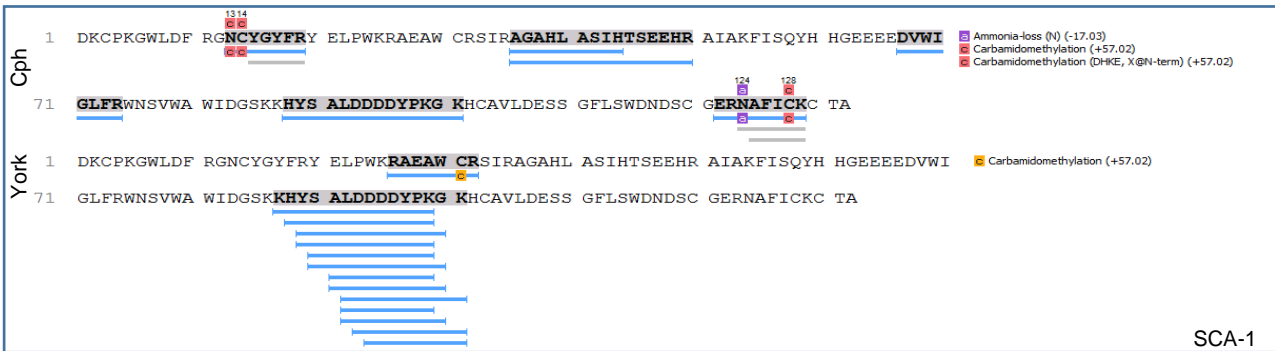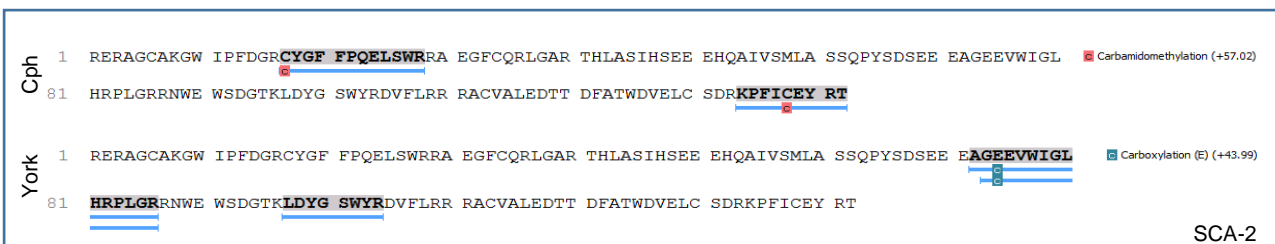

2

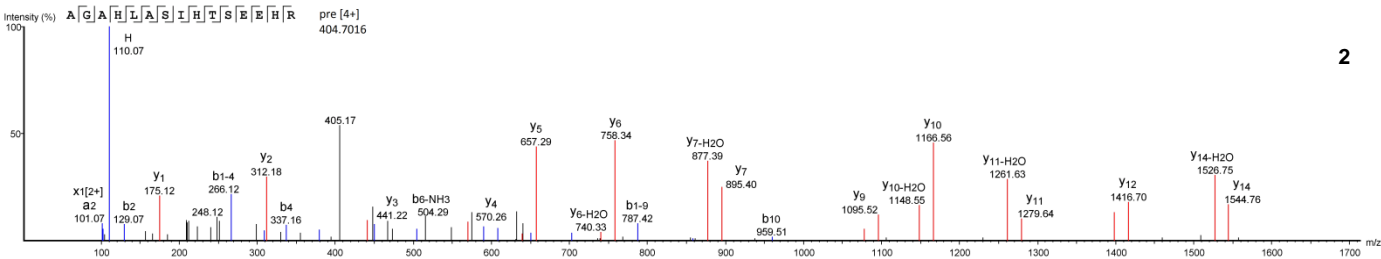

3

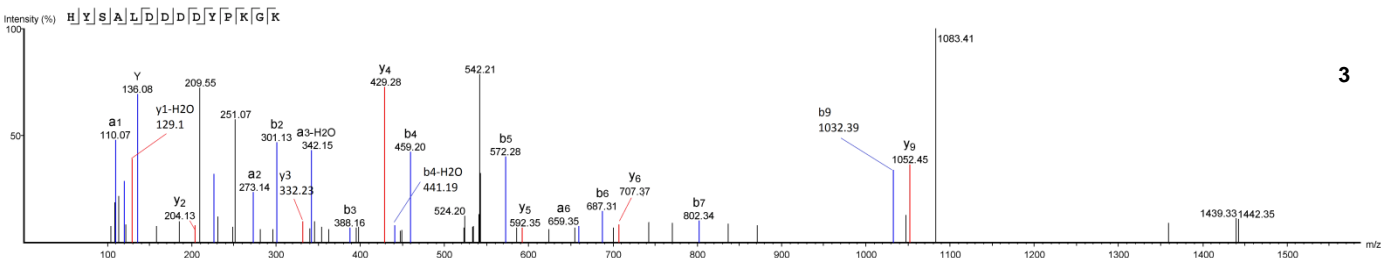

4

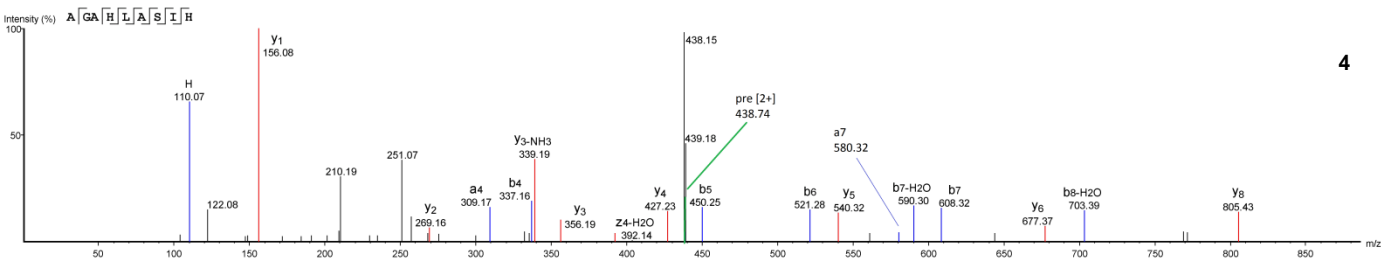

5

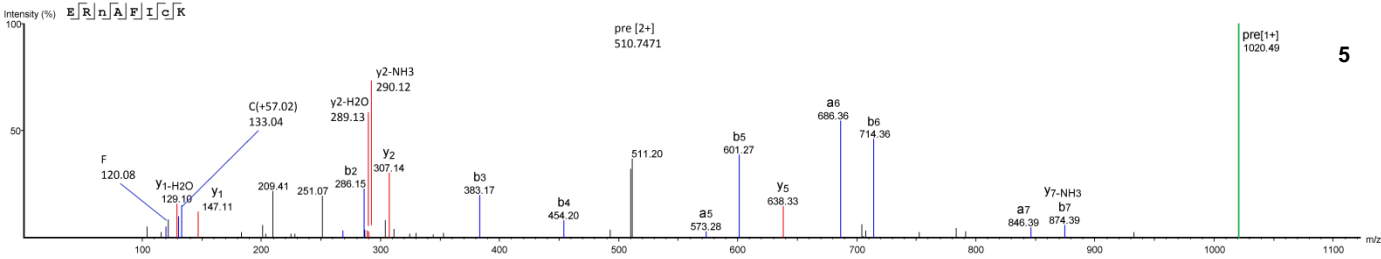



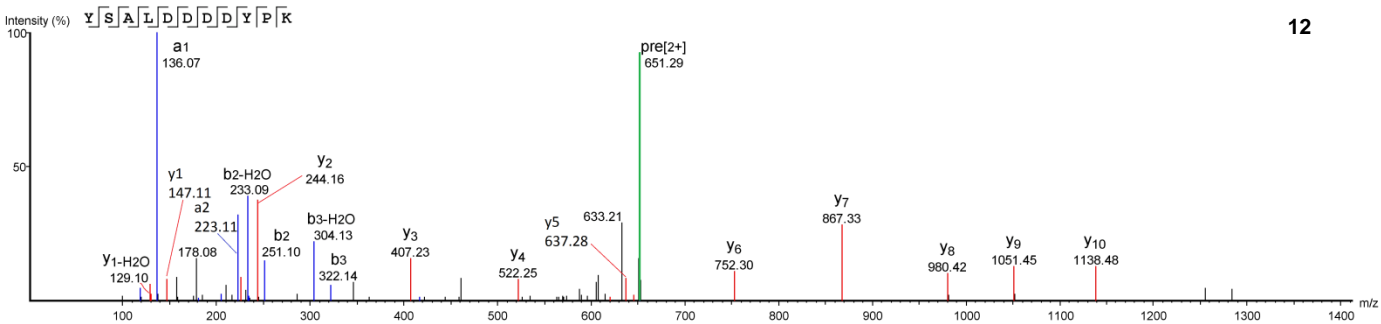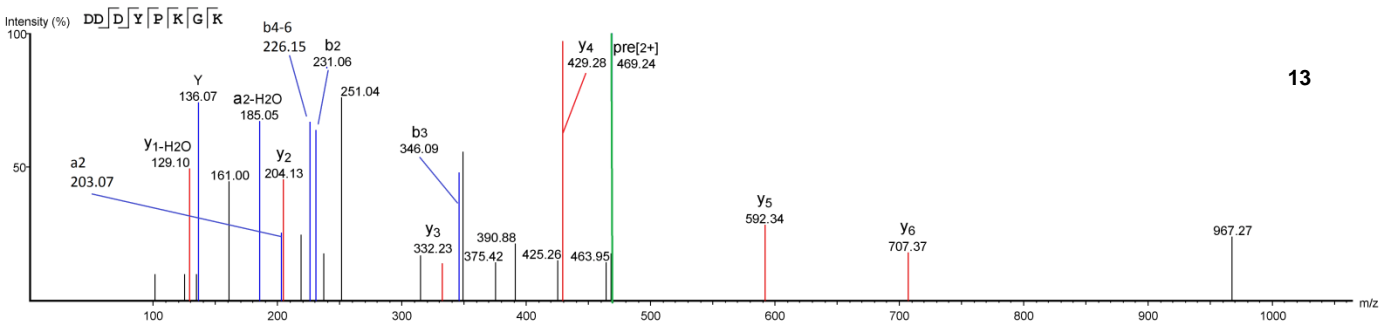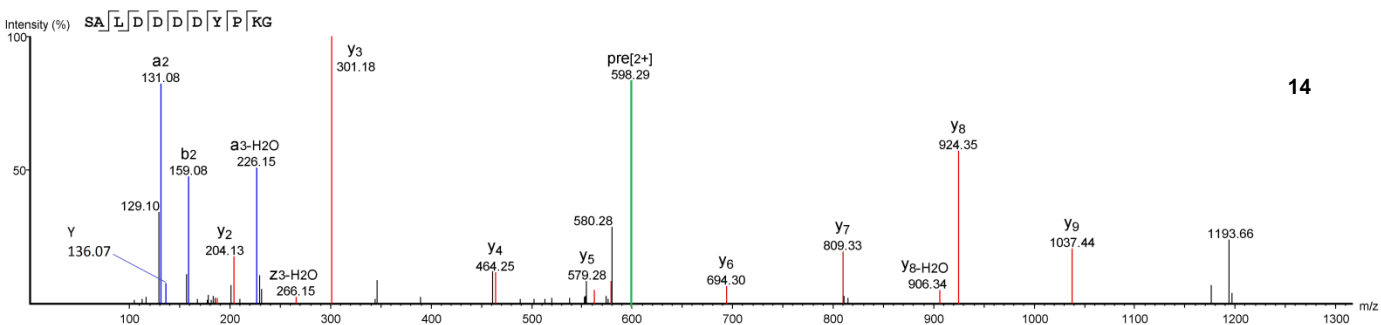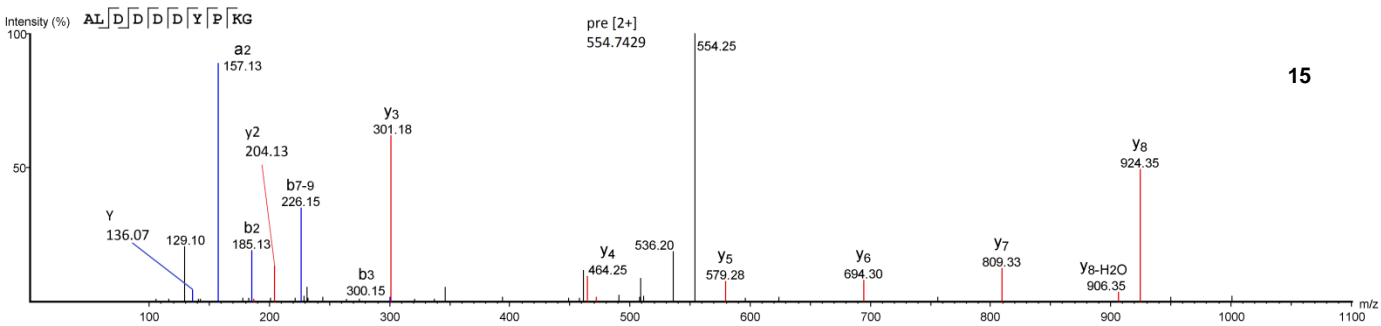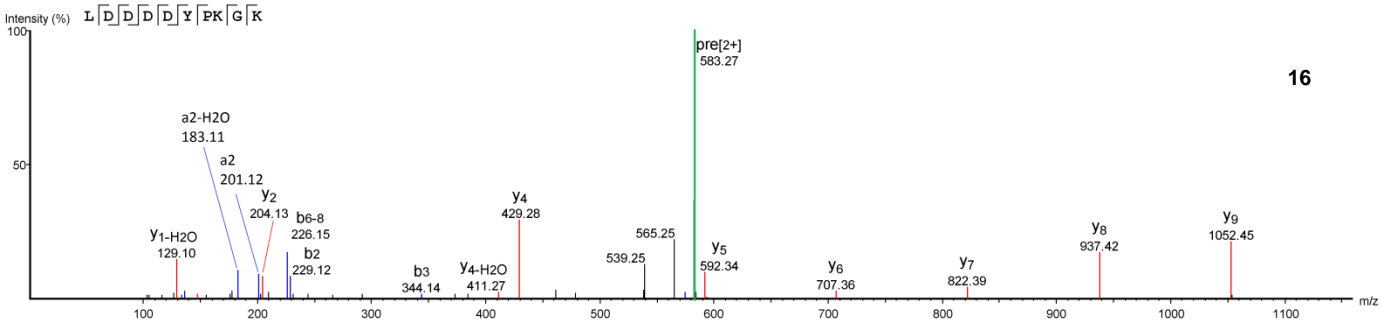

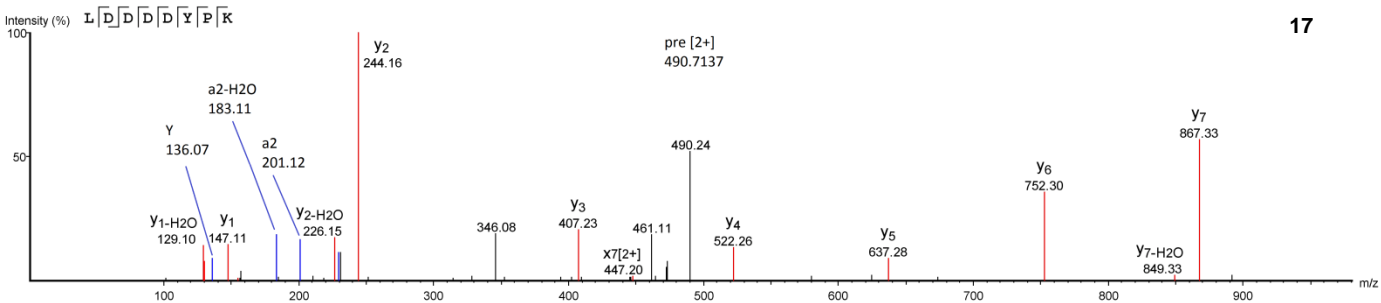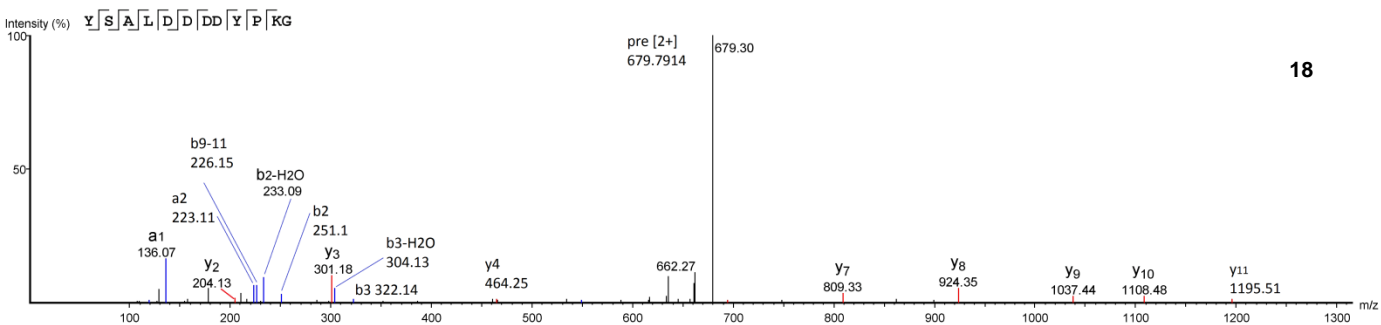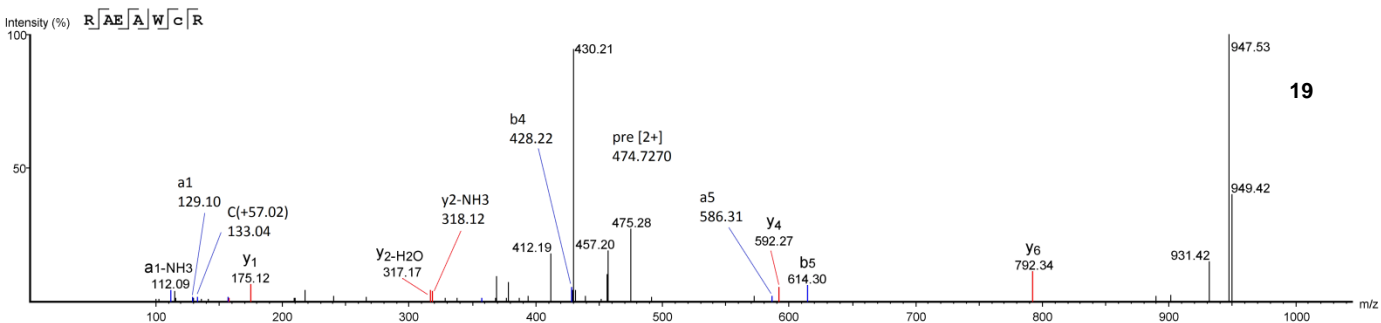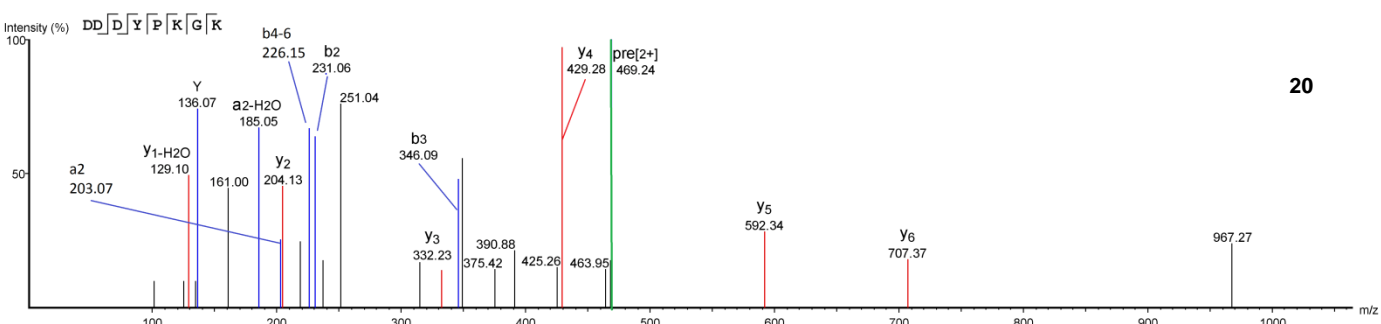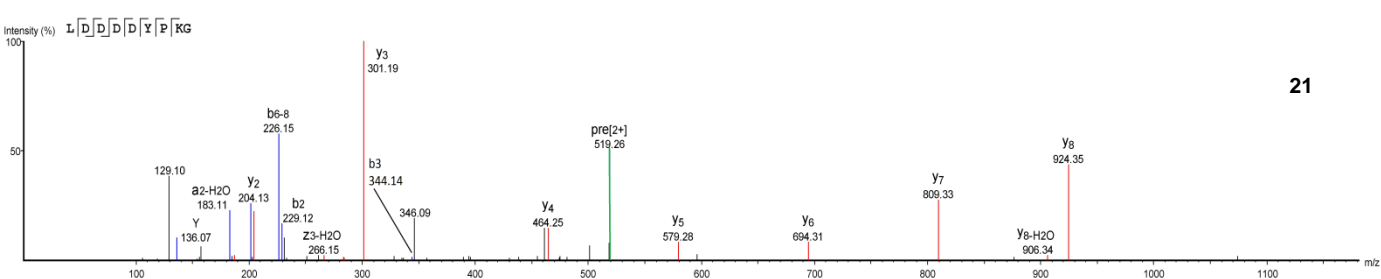

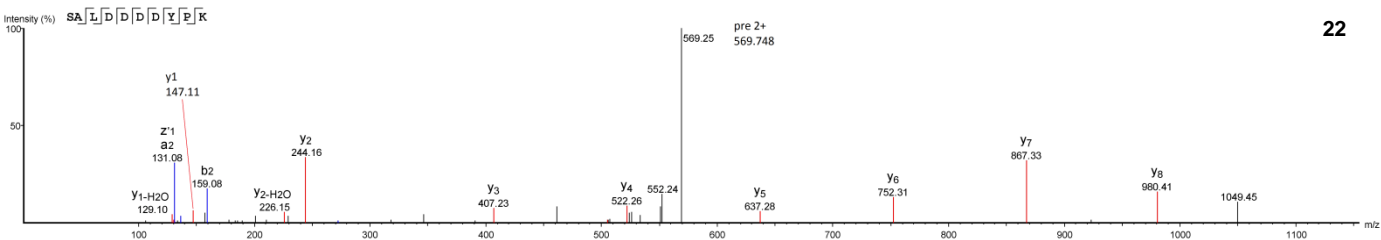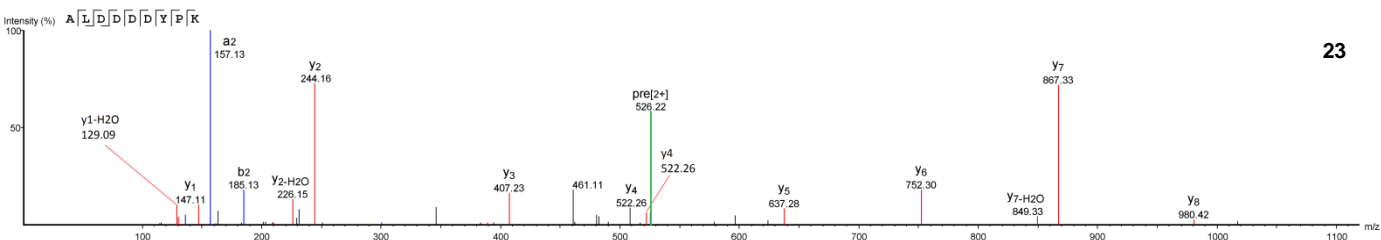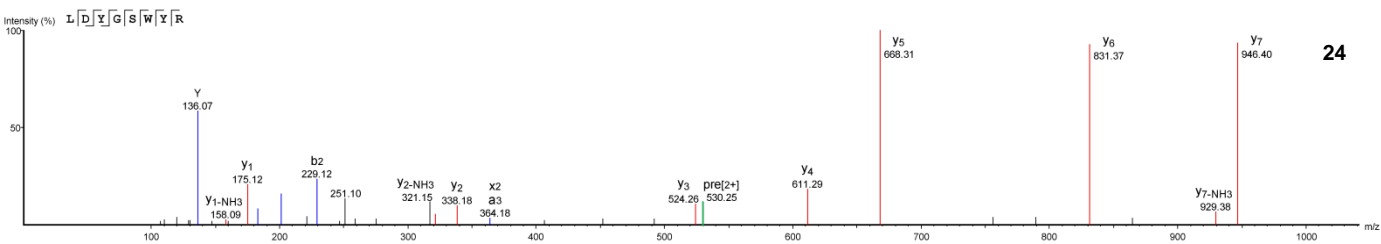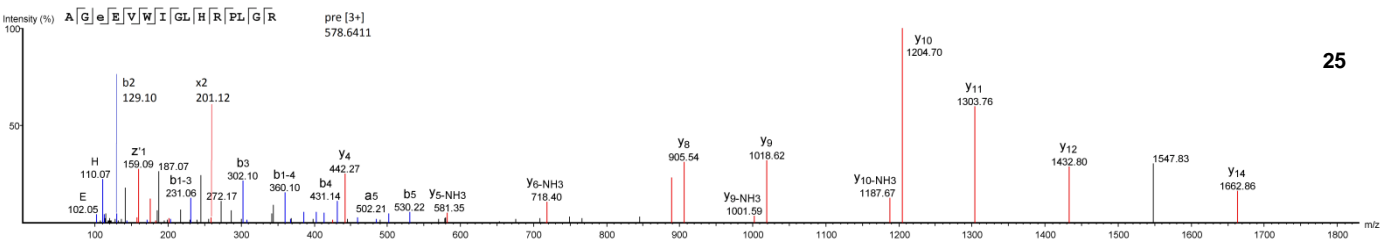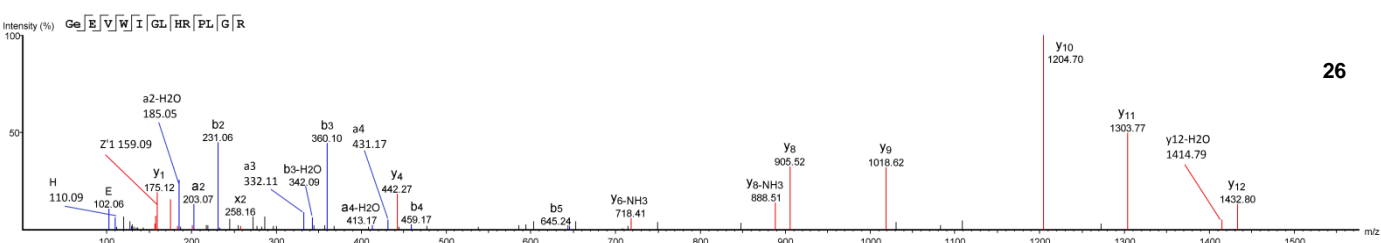

10-26: Product ion spectra (raw spectra manually annotated on the basis of PEAKS assignments) of all the York/Oxford identified sequences (see panel 1).
