# Supplementary material for: Protein sequences bound to mineral surfaces persist into deep time
Source: eLife journal article supplement (doi:10.7554/elife.17092), 2016-09-26
Supplement: supp3 [file elife-17092-supp3-v1.pdf]

1-17: Frequency of common modifications detected in each position of the sequence of SCA-1 in all bleached OES samples.

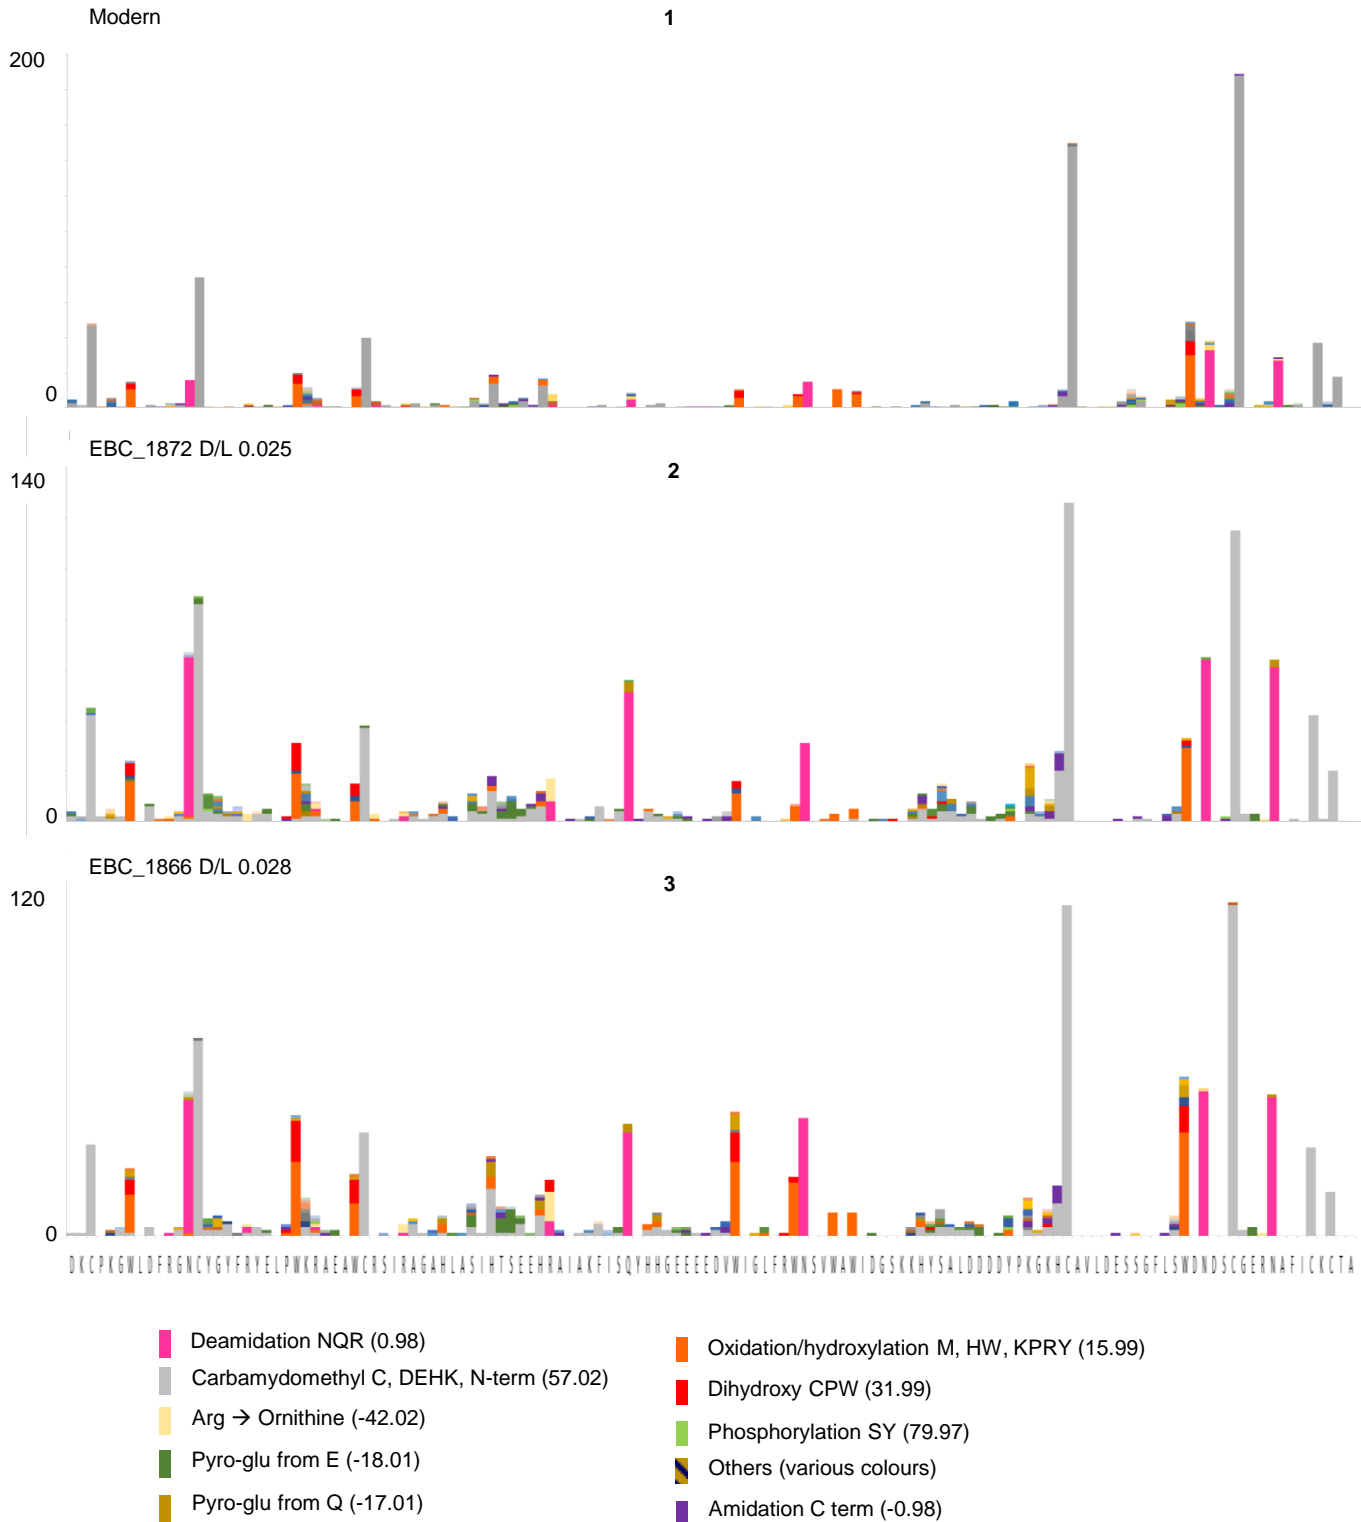

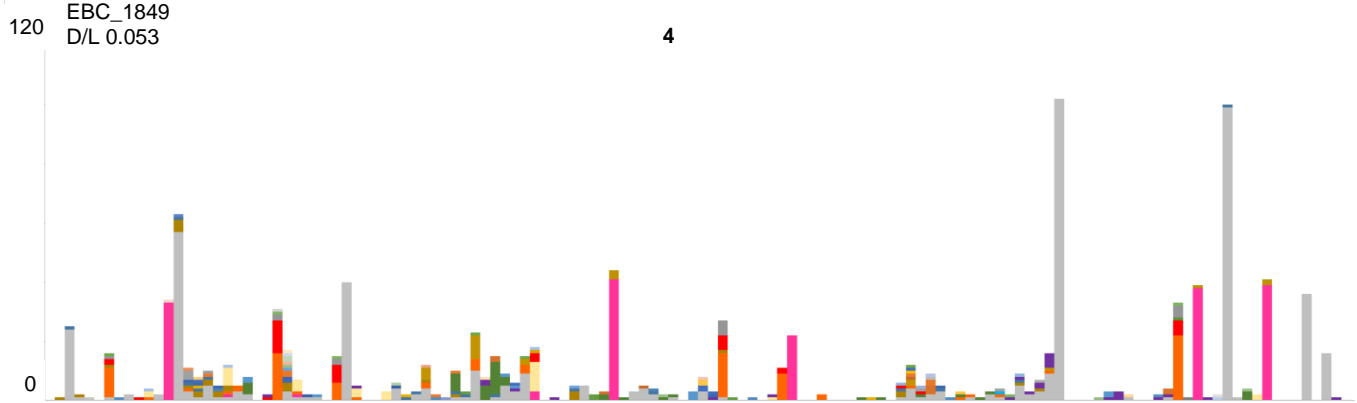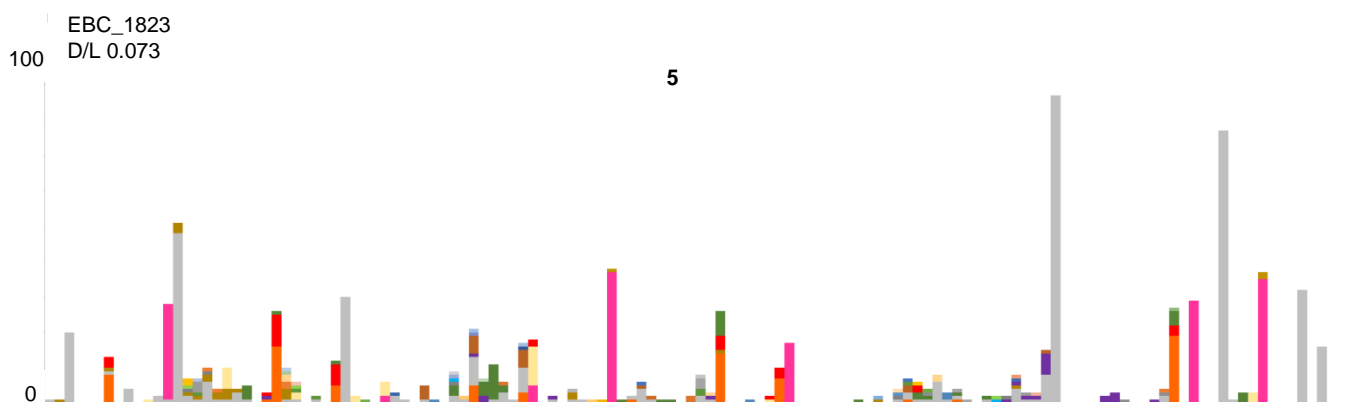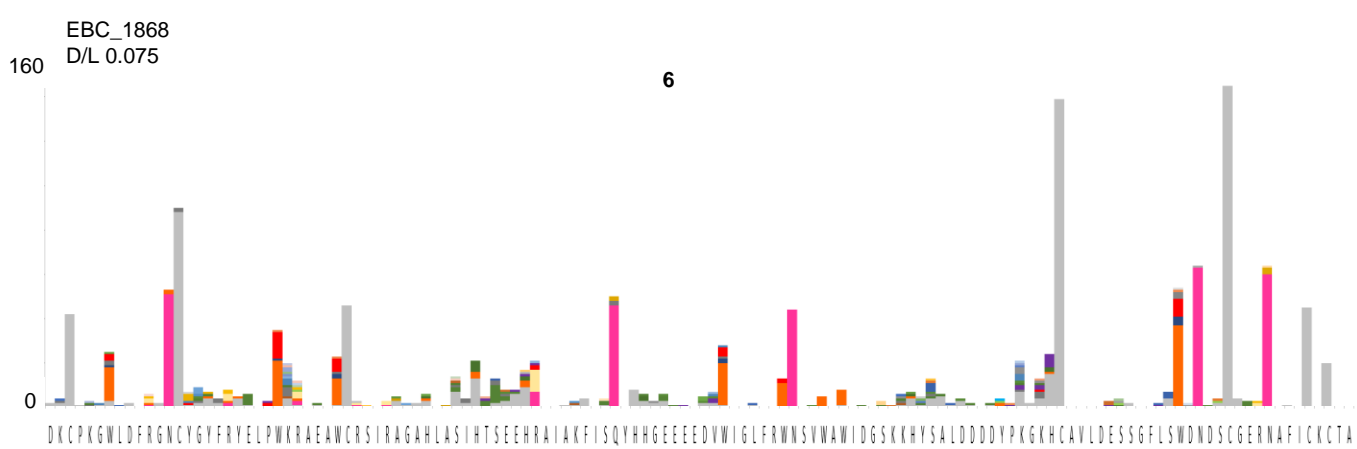

- Deamidation NQR (0.98)
  - Carbamylmethyl C, DEHK, N-term (57.02)
  - Arg → Ornithine (-42.02)
  - Pyro-glu from E (-18.01)
  - Pyro-glu from Q (-17.01)
- Oxidation/hydroxylation M, HW, KPRY (15.99)
  - Dihydroxy CPW (31.99)
  - Phosphorylation SY (79.97)
  - Others (various colours)
  - Amidation C term (-0.98)

D K C P K G W L D F R G N C Y G Y F R Y E L P W K R A E A W C R S I R A G A H L A S I H T S E E H R A I A K F I S Q Y H H G E E E D V W I G L F R W N S V W A W I D G S K K H Y S A L D D D D Y P K G K H C A V L D E S S G F L S W D N D S C G E R N A F I C K C T A

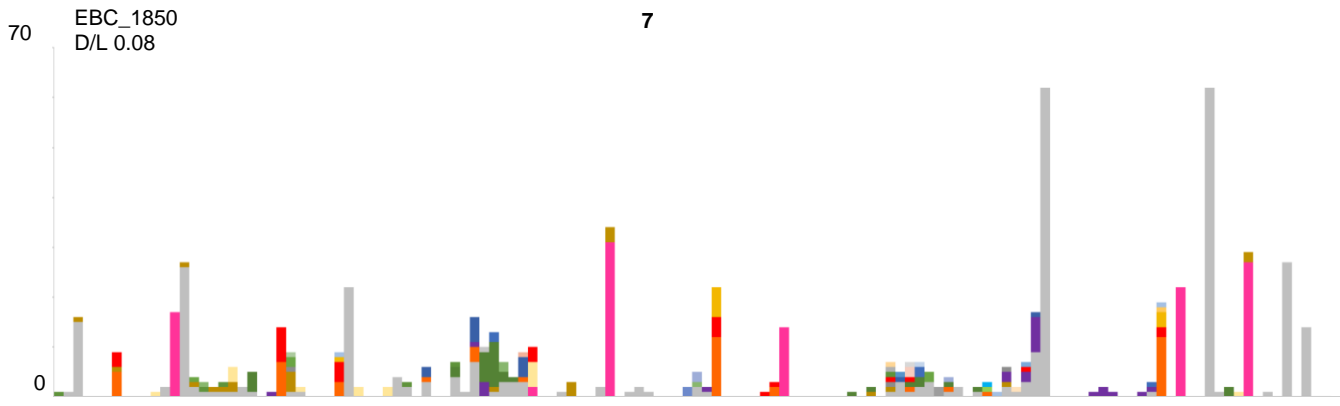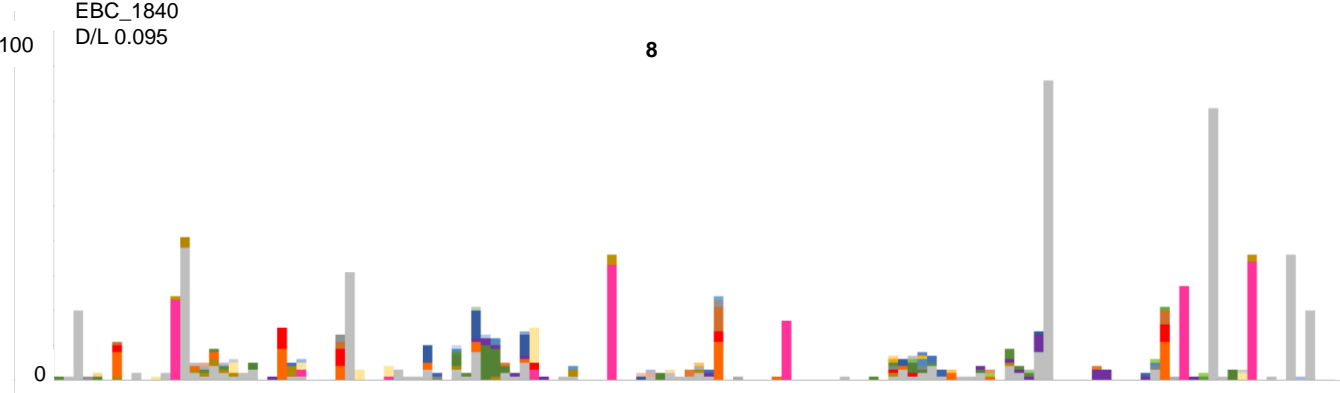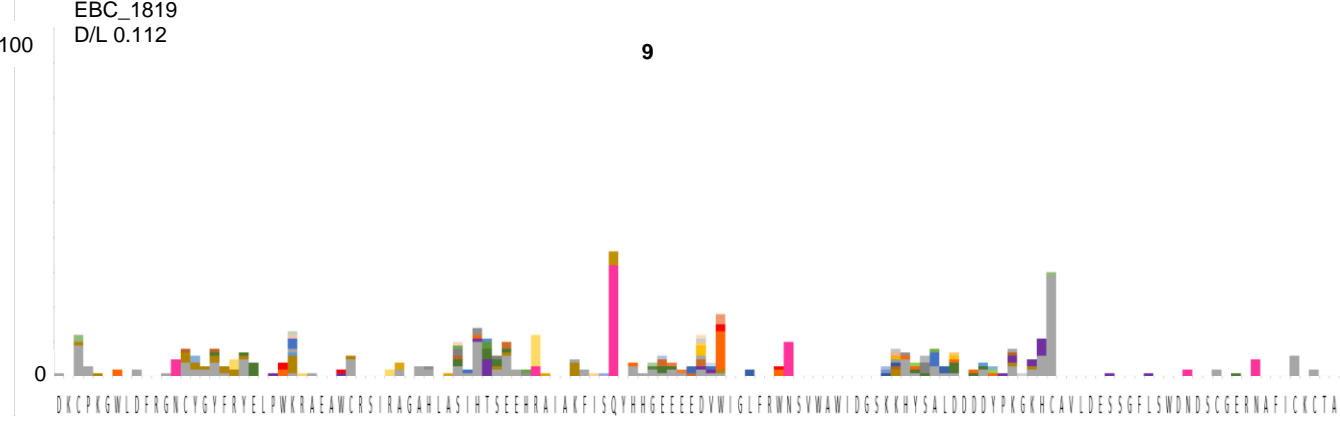

D K C P K G W L D F R G N C Y G Y F R Y E L P W K R A E A W C R S I R A G A H L A S I H T S E E H R A I A K F I S Q T H H G E E E E D V W I G L F R W N S V W A W I D G S K K H Y S A L D O D D Y P K G K H C A V L D E S S G F L S W N D S C G E R N A F I C K C T A

- Deamidation NQR (0.98)
  - Carbamylmethyl C, DEHK, N-term (57.02)
  - Arg → Ornithine (-42.02)
  - Pyro-glu from E (-18.01)
  - Pyro-glu from Q (-17.01)
- Oxidation/hydroxylation M, HW, KPRY (15.99)
  - Dihydroxy CPW (31.99)
  - Phosphorylation SY (79.97)
  - Others (various colours)
  - Amidation C term (-0.98)

10

PP5-6\_4613  
D/L 0.210

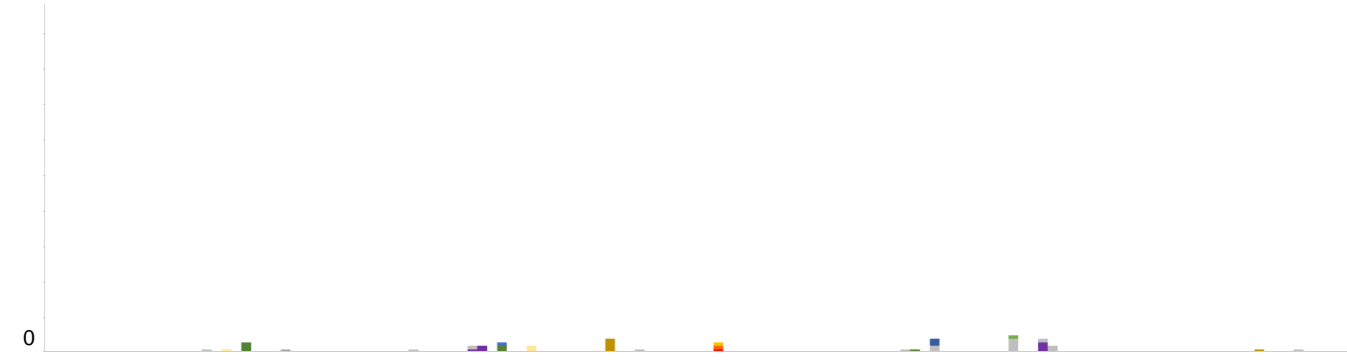

11

PP5-6\_4652  
D/L 0.233

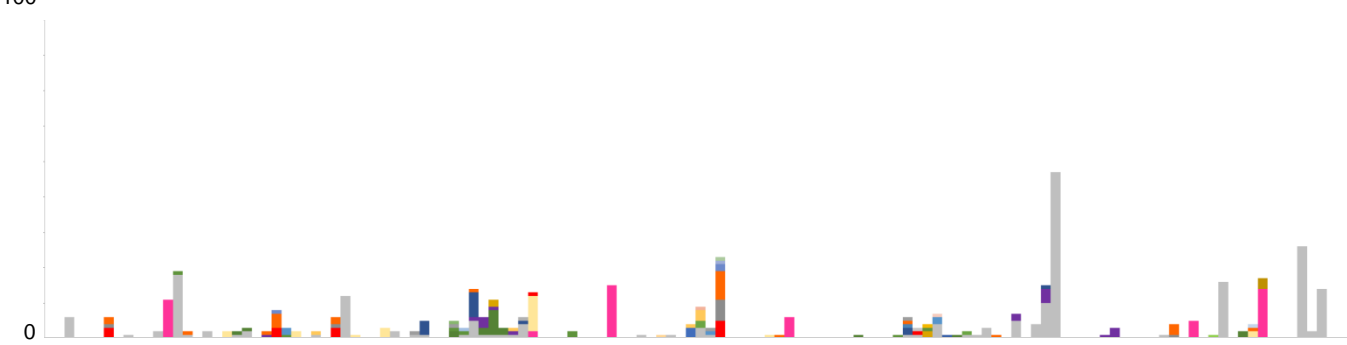

12

PP5-6\_4671  
D/L 0.242

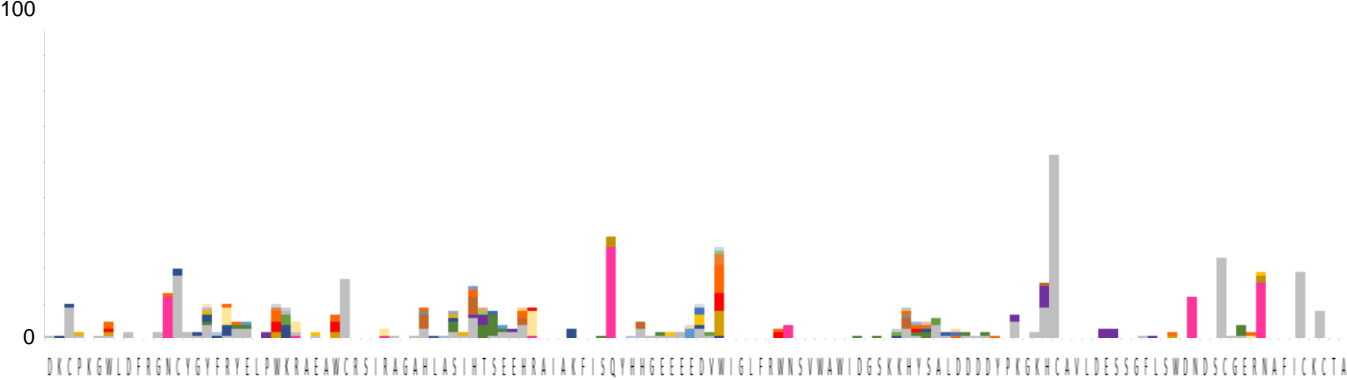

DCCPKGWLDFRGNCTGYFRYELPWKRRAEAWCRSIRAGAHLASIHTSEEHRATAKFIISQYHGGEEEDVWIGLFRWNSYVWAWIDGSKKHYSALDDDDYPKGKHCAVLDESSGFLSWNDSCGERNAFICKCTA

- Deamidation NQR (0.98)
  - Carbamylmethyl C, DEHK, N-term (57.02)
  - Arg → Ornithine (-42.02)
  - Pyro-glu from E (-18.01)
  - Pyro-glu from Q (-17.01)
- Oxidation/hydroxylation M, HW, KPRY (15.99)
  - Dihydroxy CPW (31.99)
  - Phosphorylation SY (79.97)
  - Others (various colours)
  - Amidation C term (-0.98)

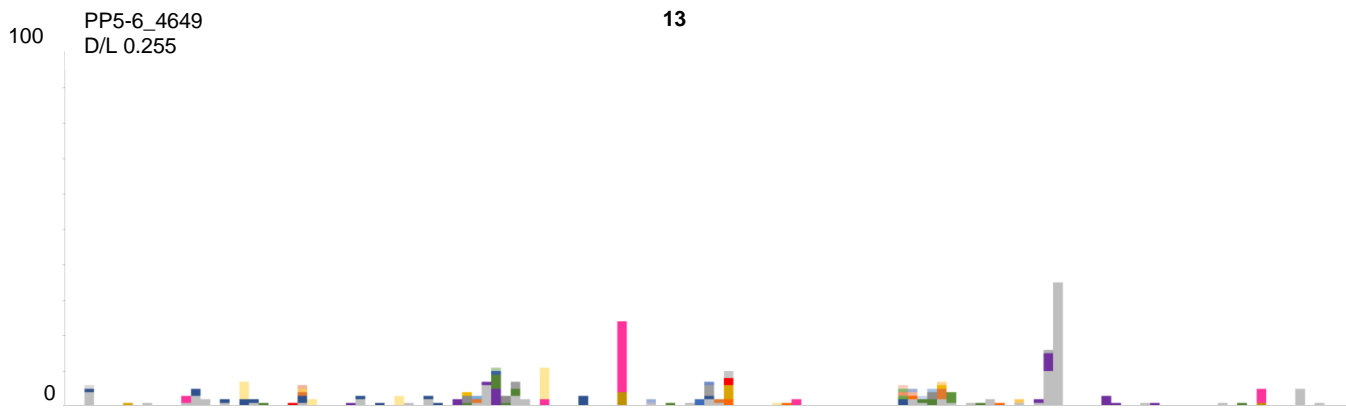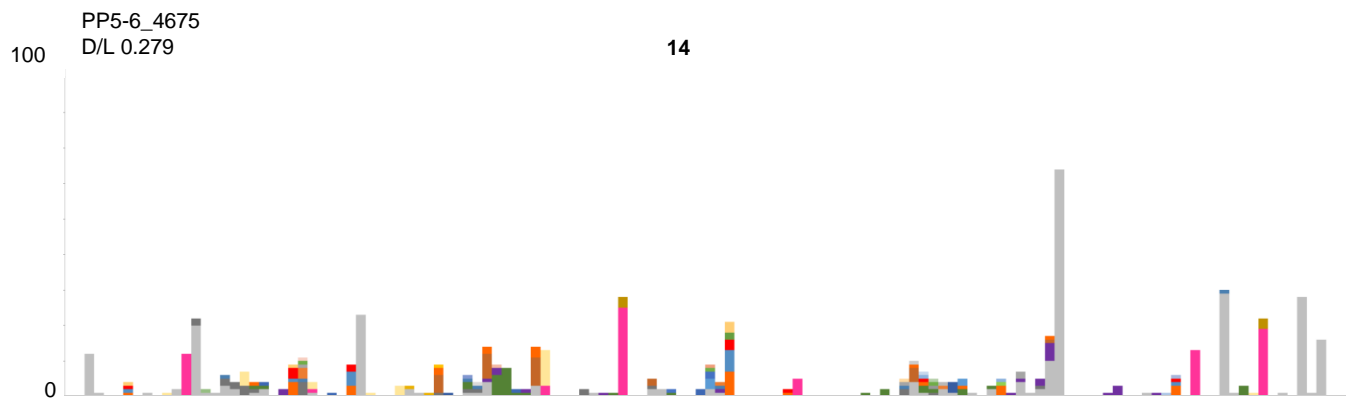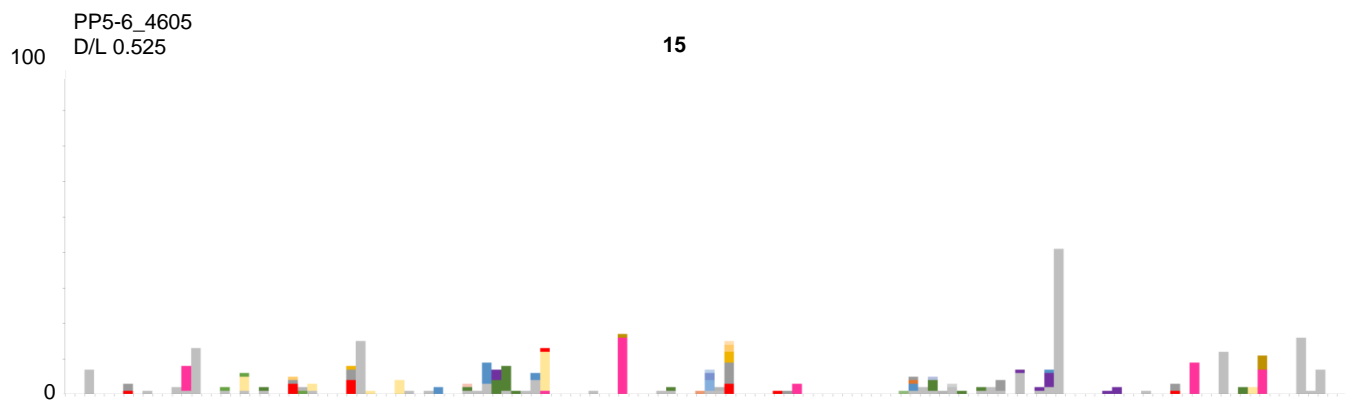

DKCPKGLDFRGNCGYFRYELPWKRAEAWCRSIRAGAHLASIHTSEEHRATKFKISQYHGGEEEDVWIGLFRNWSVWAWIDGSKKHYSALDDDDYPKGKHCAVLDSSGFLSWDNWNSCGERNAFICKCTA

- Deamidation NQR (0.98)
  - Carbamidomethyl C, DEHK, N-term (57.02)
  - Arg → Ornithine (-42.02)
  - Pyro-glu from E (-18.01)
  - Pyro-glu from Q (-17.01)
- Oxidation/hydroxylation M, HW, KPRY (15.99)
  - Dihydroxy CPW (31.99)
  - Phosphorylation SY (79.97)
  - Others (various colours)
  - Amidation C term (-0.98)

PP30\_4697  
D/L 0.368

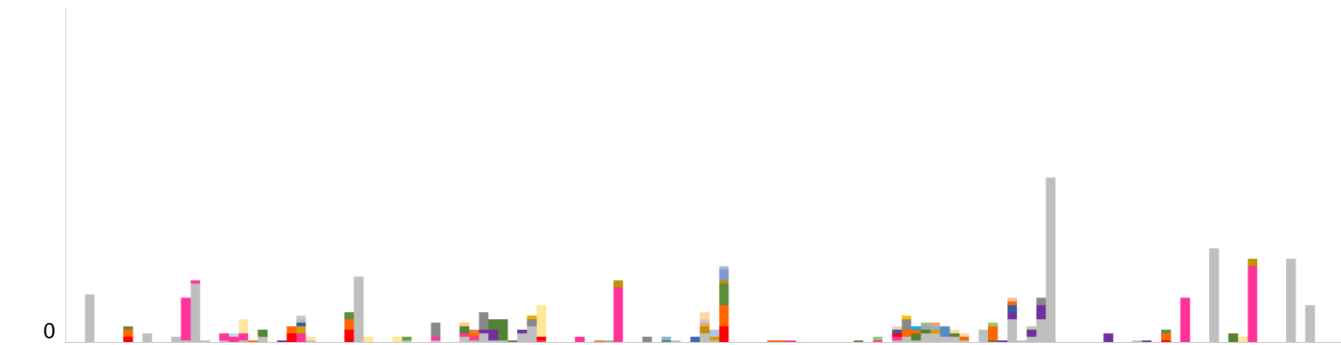

PP30\_4683  
D/L 0.373

17

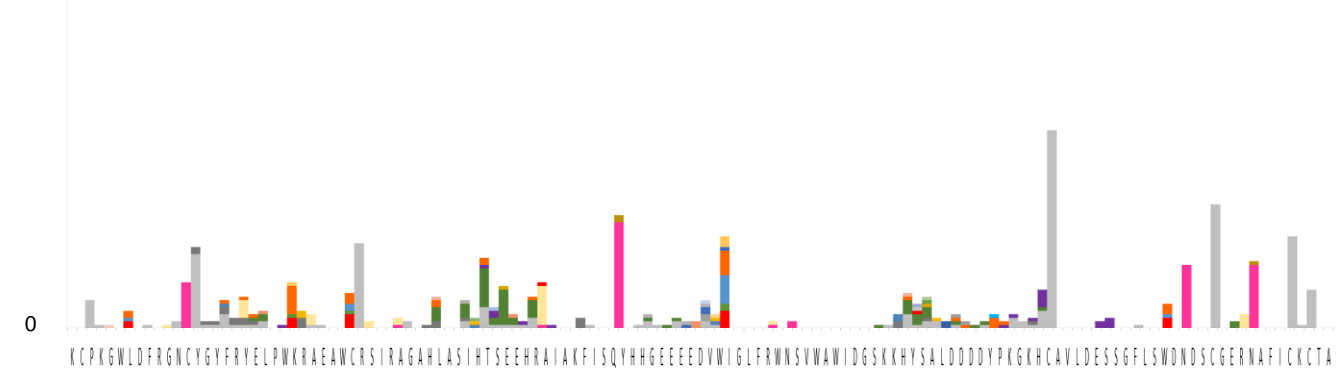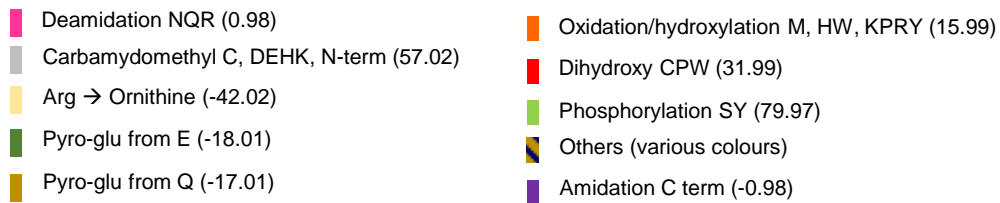

K C P K G W L D F R G N C Y G Y F R Y E L P W K R A E A W C R S I R A G A H L A S I H T S E E H R A I A K F I S Q Y H H G E E E D V W I G L F R W N S V W A W I D G S K K H Y S A L D D D Y P K G K H C A V L D E S S G F L S W D N S C G E R N A F I C K C T A

18-34: Frequency of common modifications detected in each position of the sequence of SCA-2 in all bleached OES samples.

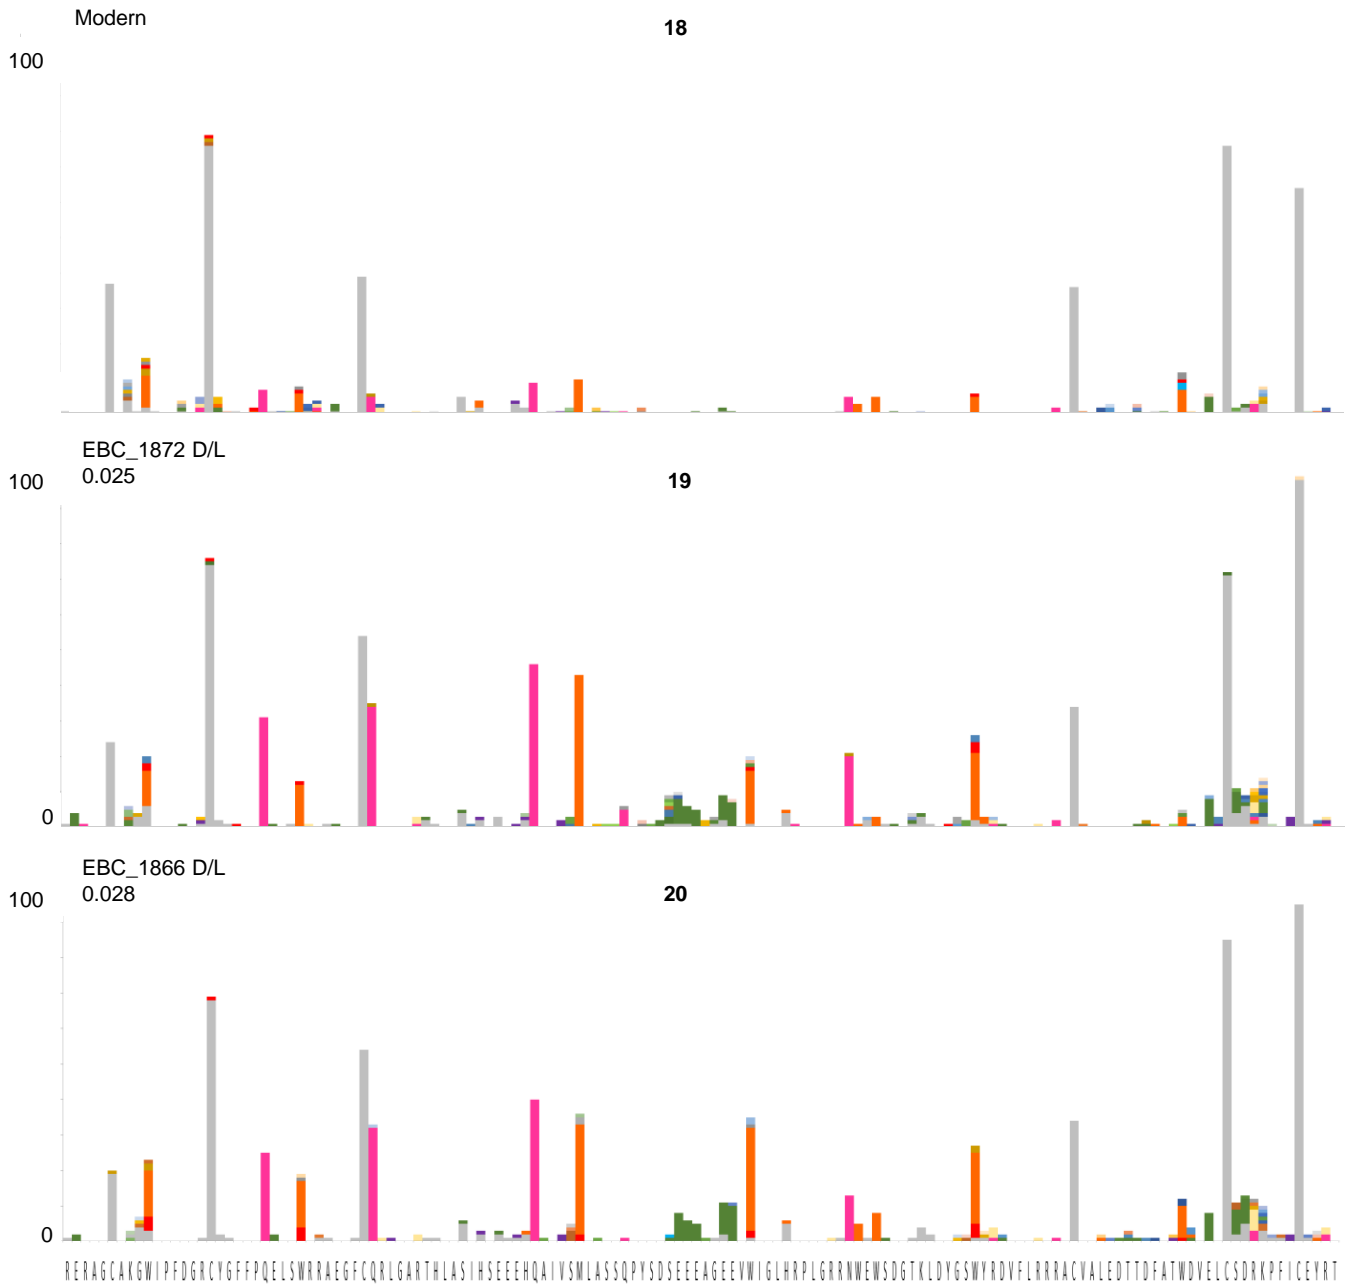

- Deamidation NQR (0.98)
- Carbamydomethyl C, DEHK, N-term (57.02)
- Arg → Ornithine (-42.02)
- Pyro-glu from E (-18.01)
- Pyro-glu from Q (-17.01)
- Oxidation/hydroxylation M, HW, KPRY (15.99)
- Dihydroxy CPW (31.99)
- Phosphorylation SY (79.97)
- Others (various colours)
- Amidation C term (-0.98)

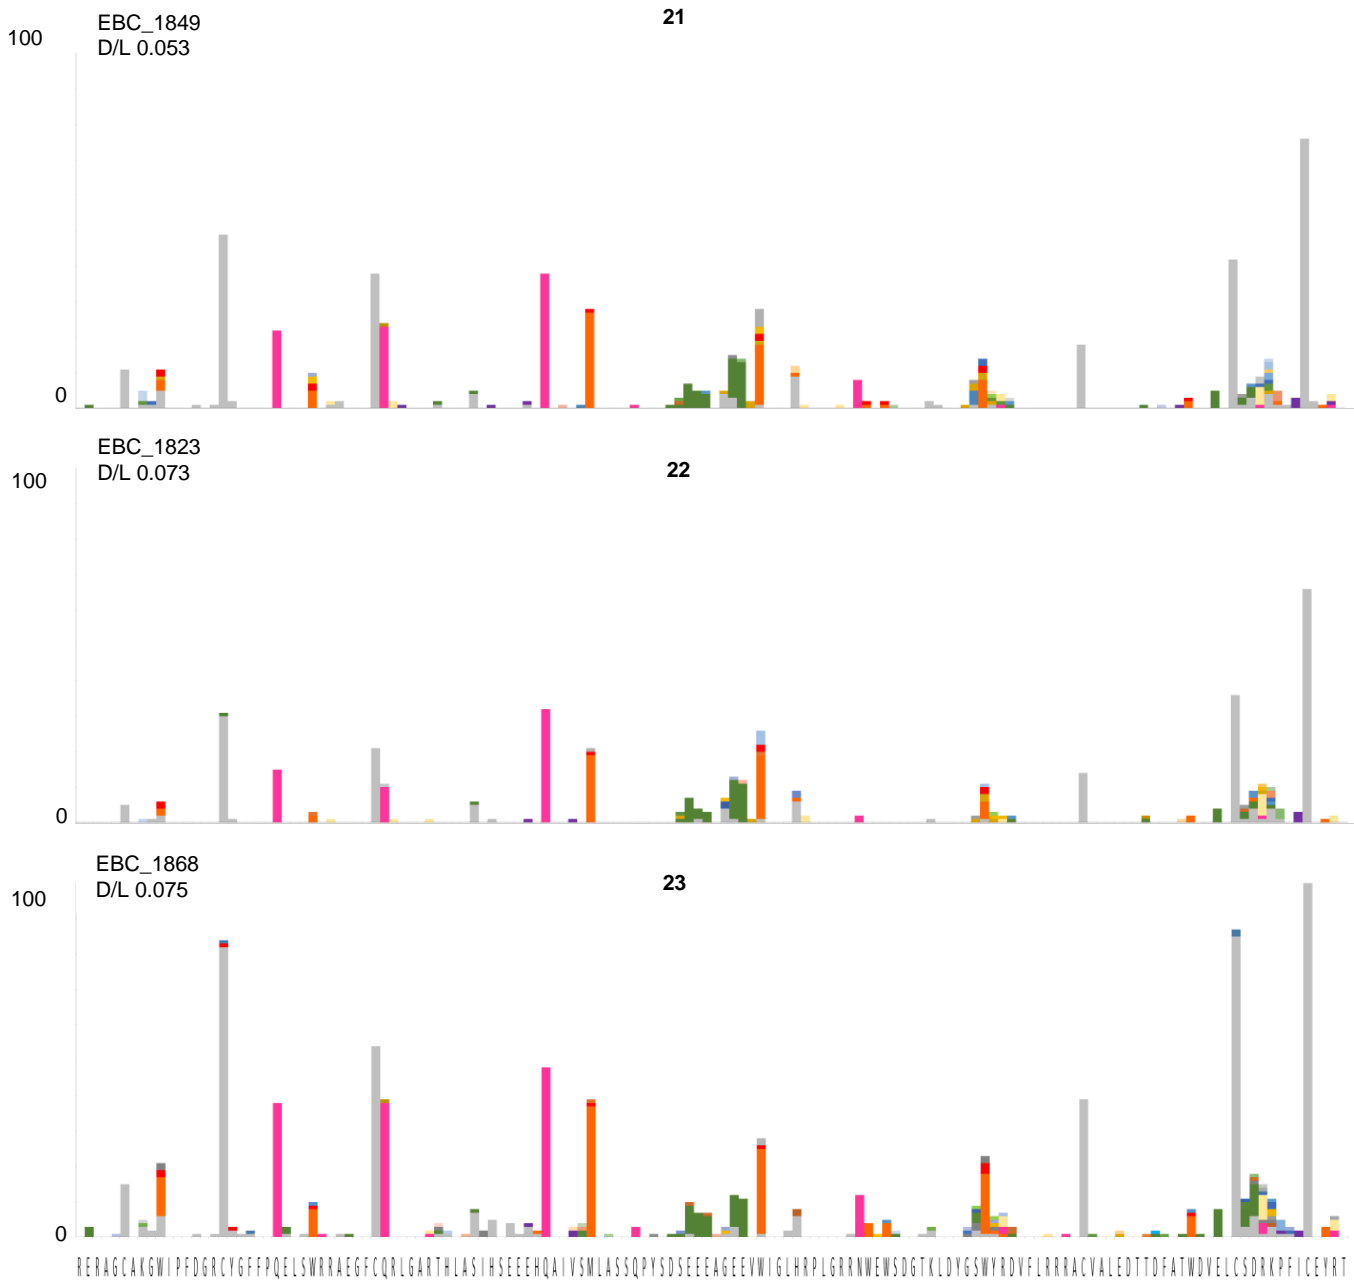

- Deamidation NQR (0.98)
  - Carbamydomethyl C, DEHK, N-term (57.02)
  - Arg → Ornithine (-42.02)
  - Pyro-glu from E (-18.01)
  - Pyro-glu from Q (-17.01)
- Oxidation/hydroxylation M, HW, KPRY (15.99)
  - Dihydroxy CPW (31.99)
  - Phosphorylation SY (79.97)
  - Others (various colours)
  - Amidation C term (-0.98)



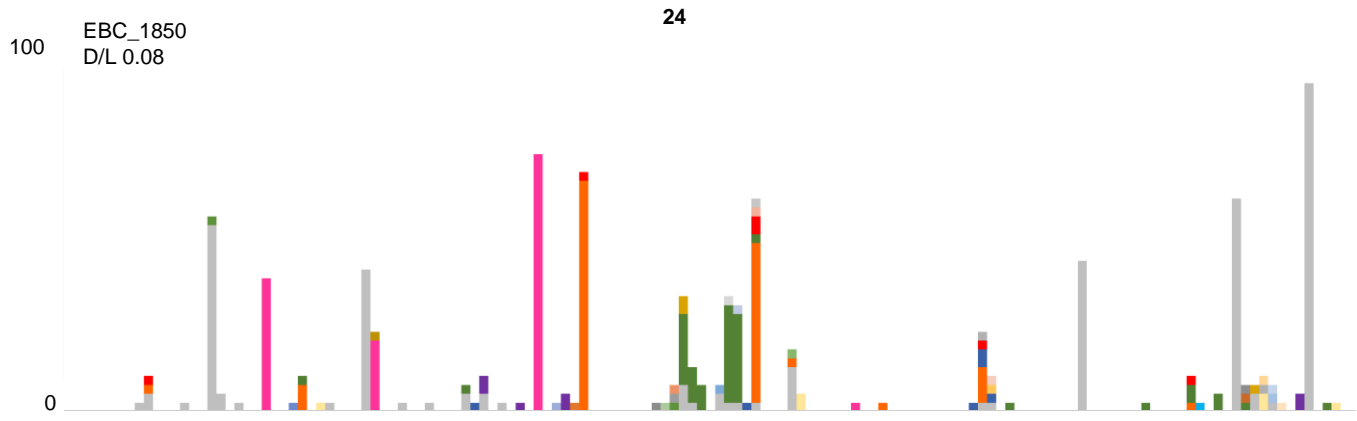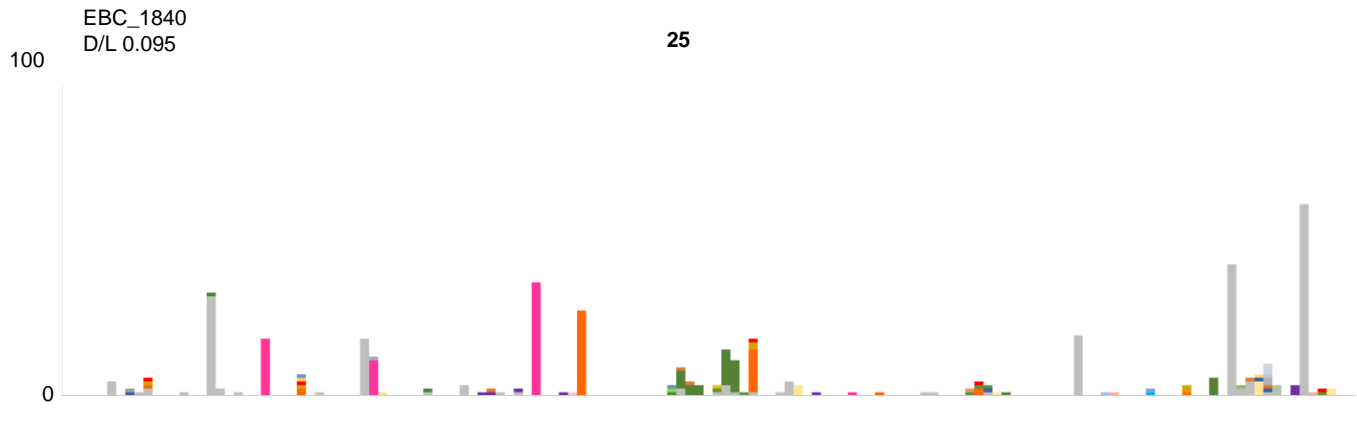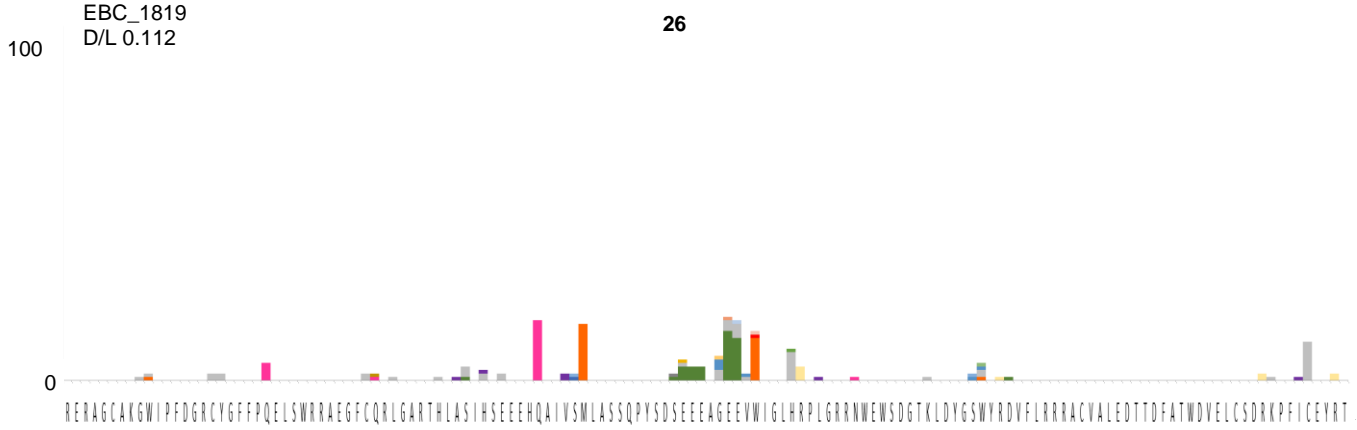

- █ Deamidation NQR (0.98)
  - █ Carbamylmethyl C, DEHK, N-term (57.02)
  - █ Arg → Ornithine (-42.02)
  - █ Pyro-glu from E (-18.01)
  - █ Pyro-glu from Q (-17.01)
- █ Oxidation/hydroxylation M, HW, KPRY (15.99)
  - █ Dihydroxy CPW (31.99)
  - █ Phosphorylation SY (79.97)
  - █ Others (various colours)
  - █ Amidation C term (-0.98)

RERAGCAKGIWIPFDGRRCYGFPPQELSWRRRAEGFCQRLGARTHLSAIHSEEEHQAI VSM LASSQPYS DSEEEAGEEVWIGLHRPLGRRNWEWS DGT KLDYGSWRDVF LRRRACVALEDTTDFATWDVVELCSDRKPFICEVRT

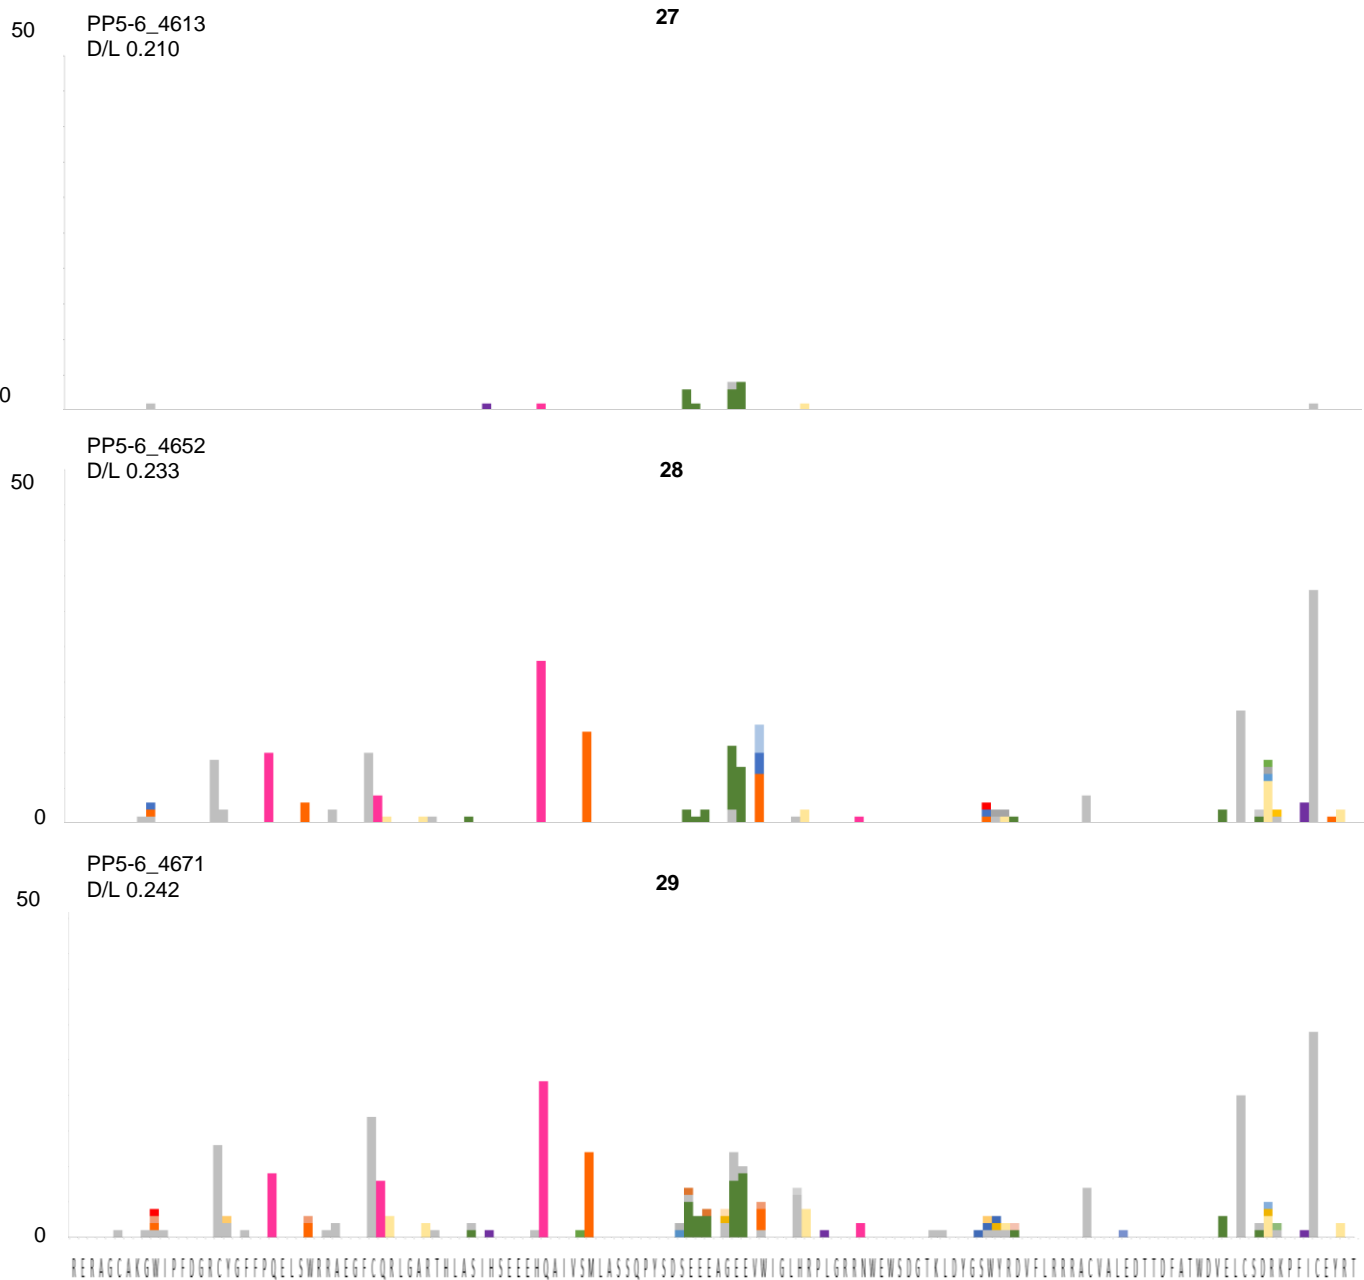

- Deamidation NQR (0.98)
  - Carbamylmethyl C, DEHK, N-term (57.02)
  - Arg → Ornithine (-42.02)
  - Pyro-glu from E (-18.01)
  - Pyro-glu from Q (-17.01)
- Oxidation/hydroxylation M, HW, KPRY (15.99)
  - Dihydroxy CPW (31.99)
  - Phosphorylation SY (79.97)
  - Others (various colours)
  - Amidation C term (-0.98)

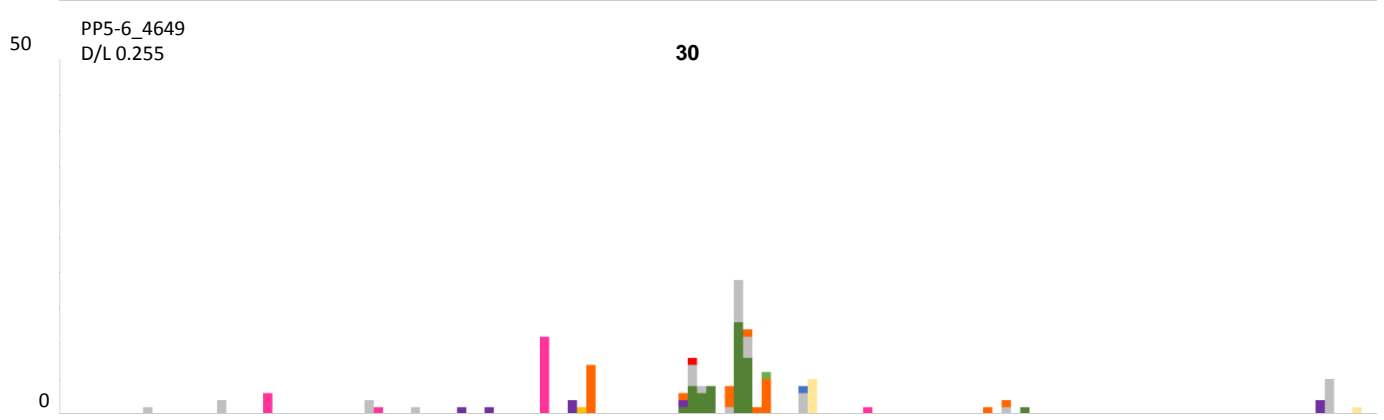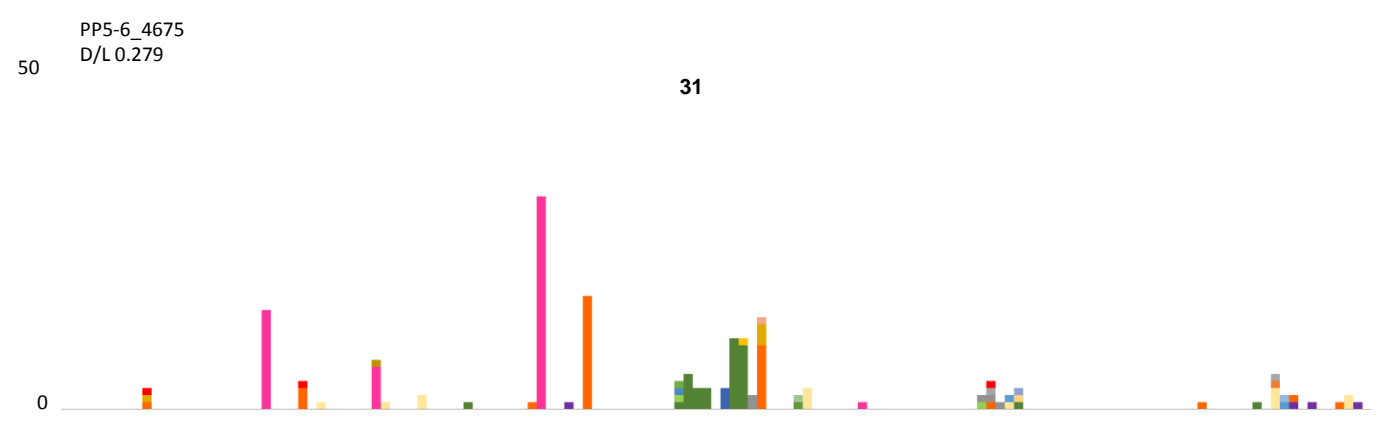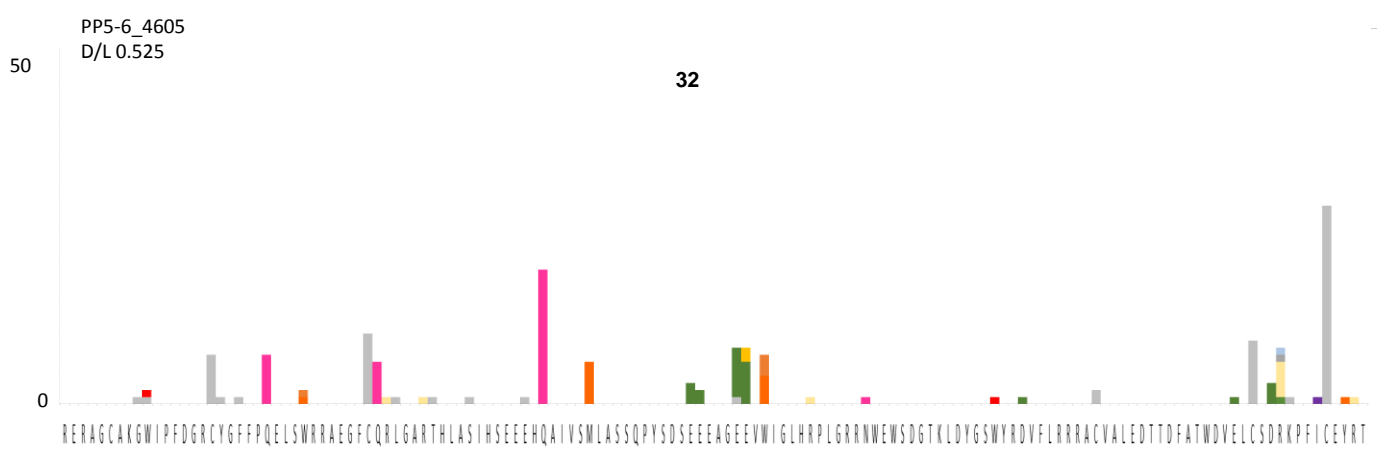

R E R A G C A K G W I P F D G R C Y G F F P Q E L S W R R A E G F C Q R L G A R T H L A S I H S E E H Q A I V S M L A S S Q P Y S D S E E A G E E V W I G L H R P L G R R N W E W S D G T K L D Y G S W Y R D V F L R R R A C V A L E D T T D F A T W D V E L C S O R K P F I C E Y R T

- Deamidation NQR (0.98)
- Carbamidomethyl C, DEHK, N-term (57.02)
- Arg → Ornithine (-42.02)
- Pyro-glu from E (-18.01)
- Oxidation/hydroxylation M, HW, KPRY (15.99)
- Dihydroxy CPW (31.99)
- Arg → Ornithine (-42.02)
- Pyro-glu from E (-18.01)
- Phosphorylation SY (79.97)
- Others (various colours)
- Pyro-glu from Q (-17.01)
- Amidation C term (-0.98)

PP30\_4697  
D/L 0.368

33

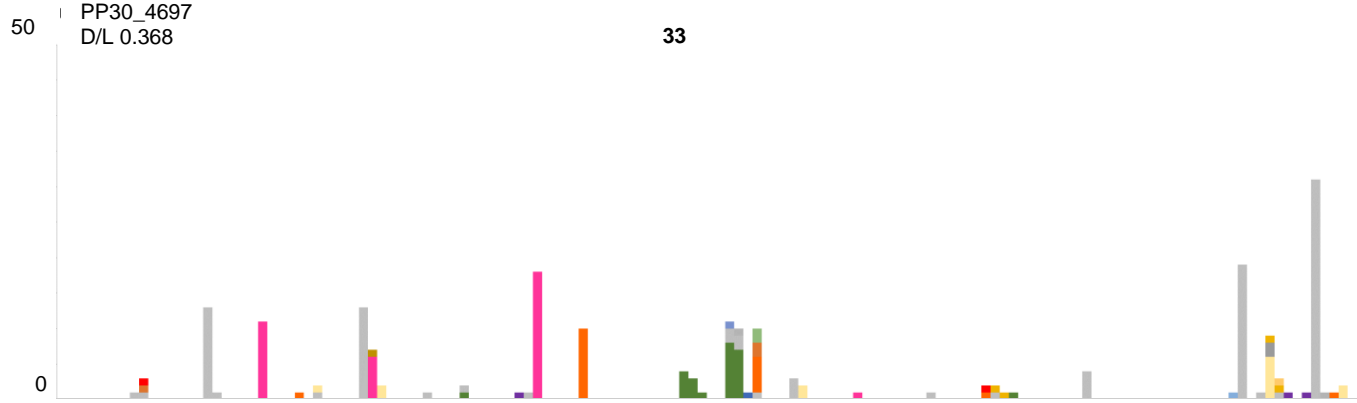

PP30\_4683  
D/L 0.373

34

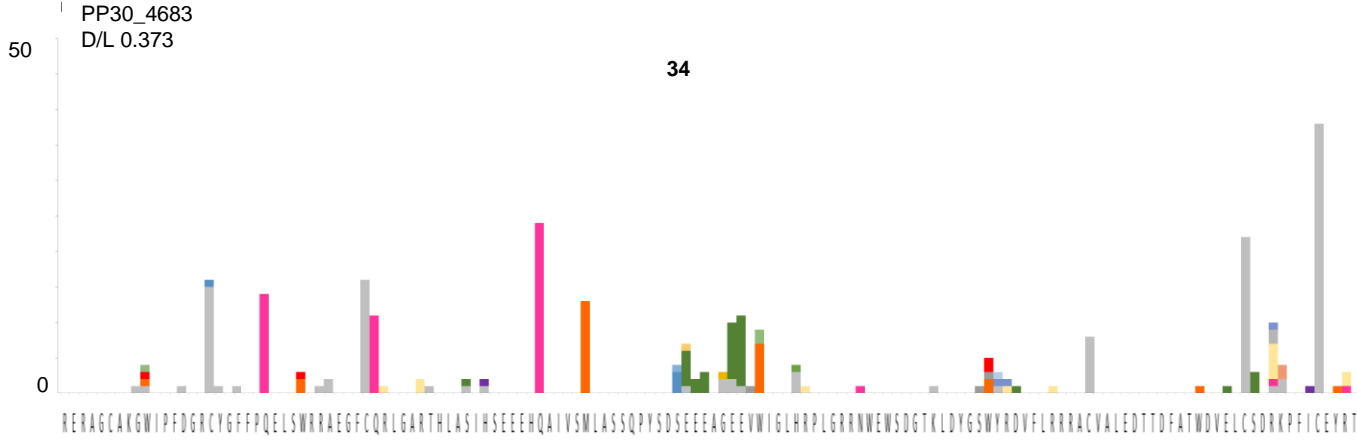

- Deamidation NQR (0.98)
- Oxidation/hydroxylation M, HW, KPRY (15.99)
- Carbamylmethyl C, DEHK, N-term (57.02)
- Dihydroxy CPW (31.99)
- Arg → Ornithine (-42.02)
- Phosphorylation SY (79.97)
- Pyro-glu from E (-18.01)
- Amidation C term (-0.98)
- Others (various colours)
- Pyro-glu from Q (-17.01)

R E R A G C A K G W I P F D G R C Y G F F P Q E L S W R R A E G F C Q R L G A R T H L A S I H S E E H Q A I V S M L A S S Q P Y S D S E E E A G E E V W I G L H R P L G R R N W E N S D G T K L D Y G S W Y R D V F L R R R A C V A L E D T T D F A T W D V E L C S D R K P F I C E Y R T
